# Supplementary material for: Solid Dosage Forms of Dexamethasone Sodium Phosphate Intended for Pediatric Use: Formulation and Stability Studies
Source: MDPI journal article supplement (doi:10.3390/pharmaceutics12040354), 2020-04-14
Supplement: s1 [file s1]

# Supplementary Materials: Solid Dosage Forms of Dexamethasone Sodium Phosphate Intended for Pediatric Use: Formulation and Stability Studies

Maria S. Synaridou, Eleftherios G. Andriotis, Constantinos K. Zacharis, Dimitrios G. Fatouros and Catherine K. Markopoulou

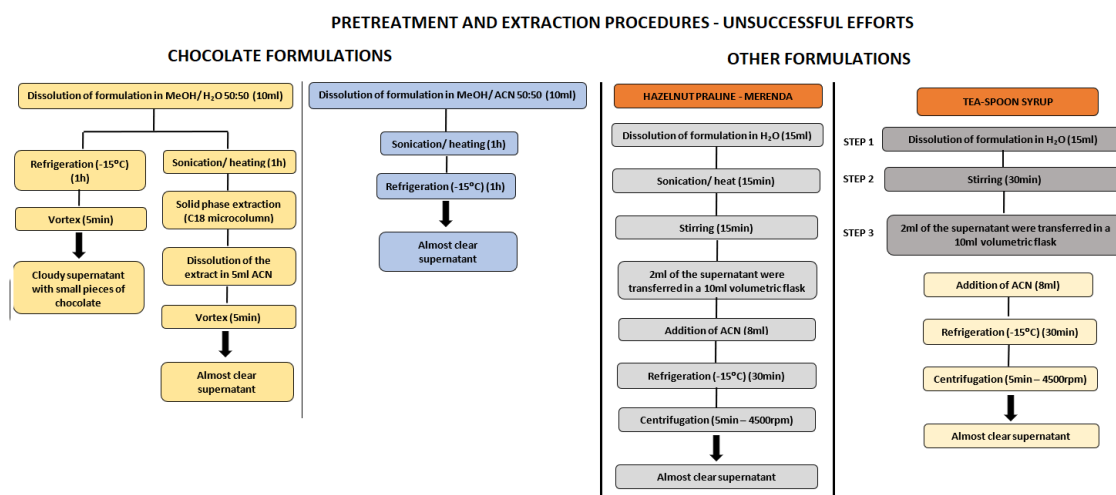

**Figure S1.** Schematic diagram of sample pre-treatment and extraction unsuccessful efforts of chocolate and other (hazelnut praline and tea-spoon syrup) formulations.
